# Supplementary material for: Thyroid Hormone Induces Ca2+-Mediated Mitochondrial Activation in Brown Adipocytes
Source: MDPI journal article supplement (doi:10.3390/ijms22168640), 2021-08-11
Supplement: s1 [file s1]

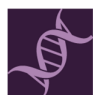

Article

# Thyroid Hormone Induces $\text{Ca}^{2+}$ -mediated Mitochondrial Activation in Brown Adipocytes

Minh-Hanh Thi Nguyen <sup>1,2,3</sup>, Dat Da Ly <sup>1,2</sup>, Nhung Thi Nguyen <sup>1,2</sup>, Xu-Feng Qi <sup>4</sup>, Hyon-Seung Yi <sup>5</sup>, Minho Shong <sup>5</sup>, Seung-Kuy Cha <sup>1,2,3</sup>, Sangkyu Park <sup>1,6,\*</sup>, Kyu-Sang Park <sup>1,2,3,\*</sup>

<sup>1</sup> Mitohormesis Research Center, Yonsei University Wonju College of Medicine, Wonju, Korea; minh-hanh.tnguyen@yonsei.ac.kr (M.-H.T.N.); dadat.p10@gmail.com (D.D.L.); skcha@yonsei.ac.kr (S.-K.C.); skpark00@yonsei.ac.kr (S.P.); qsang@yonsei.ac.kr (K.-S.P.).

<sup>2</sup> Department of Physiology, Yonsei University Wonju College of Medicine, Wonju, Korea

<sup>3</sup> Department of Global Medical Science, Yonsei University Wonju College of Medicine, Wonju, Korea,

<sup>4</sup> Key Laboratory of Regenerative Medicine, Ministry of Education, Department of Developmental and Regenerative Biology, Jinan University, Guangzhou, China; qixufeng@jnu.edu.cn (X.-F.Q.)

<sup>5</sup> Department of Internal Medicine, Chungnam National University School of Medicine, Daejeon, Korea; jmp-books00@gmail.com (H.-S.Y.); minhos@cnu.ac.kr (M.S.).

<sup>6</sup> Department of Precision Medicine, Yonsei University Wonju College of Medicine, Wonju, Korea

\* Correspondence: skpark00@yonsei.ac.kr; Tel.: (+82-33-741-0154), qsang@yonsei.ac.kr; Tel.: (+82-33-741-0294)

## Table of contents

**Figure S1.**  $T_3$  induces changes in functions of brown adipocytes' mitochondria within 30 min.

**Figure S2.**  $T_3$  induces changes in cell signaling within 30 min.

**Figure S3.**  $T_3$ -induced cytosolic  $\text{Ca}^{2+}$  increase regulates OCR and cell signaling alterations.

**Figure S4.** Both  $[\text{Ca}^{2+}]_i$ -CaM activation and mitochondrial  $\text{Ca}^{2+}$  influx are involved in  $T_3$ -induced OCR elevation.

**Figure S5.** PLC inhibitors inhibit effects of  $T_3$  on brown adipocytes.

**Figure S6.**  $T_3$  induces phosphorylations of AMP kinase and acetyl-coA carboxylase.

## Supplemental Methods

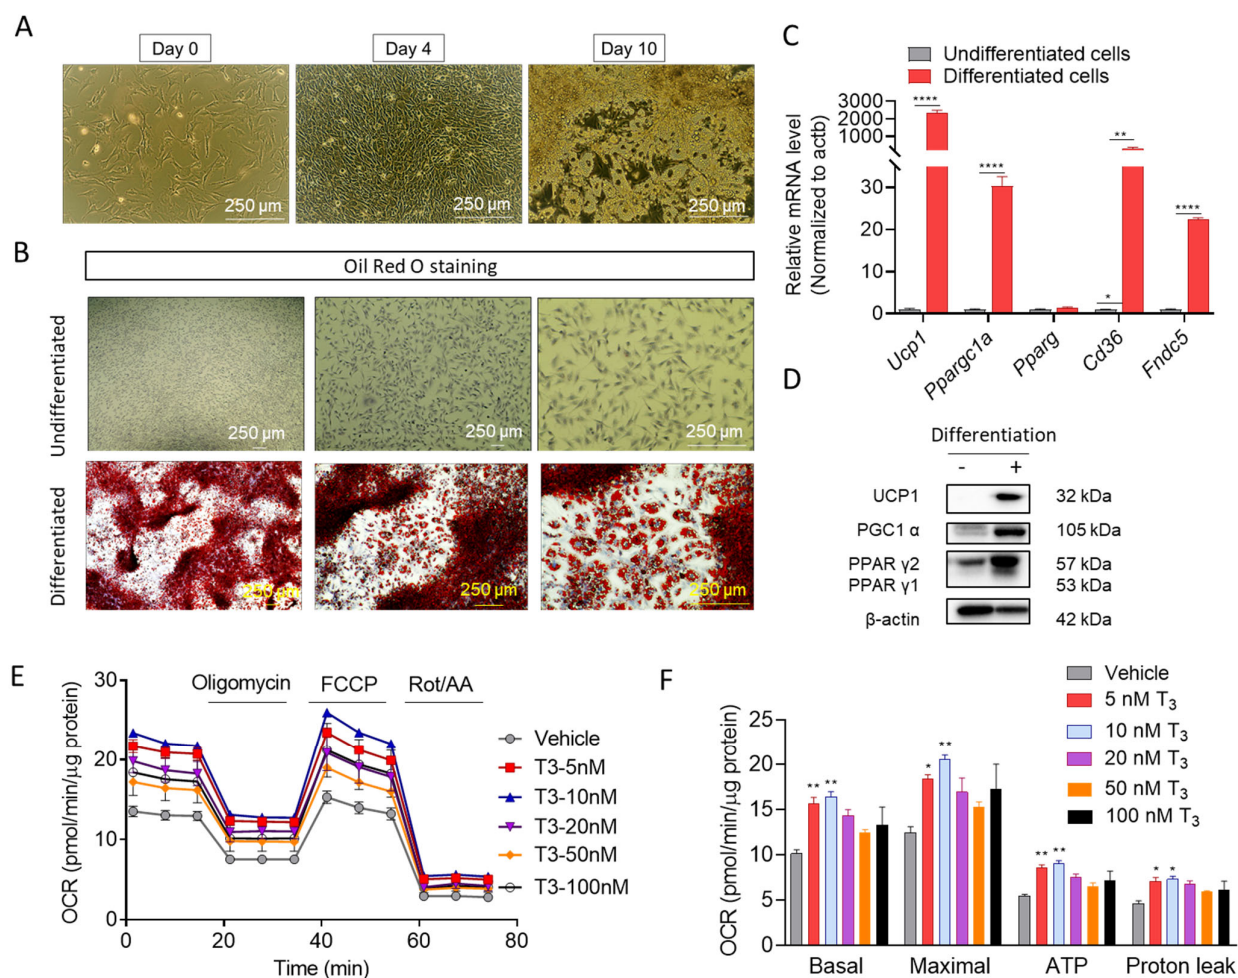

**Figure S1.** T<sub>3</sub> induces changes in brown adipocyte mitochondria functions within 30 min. (A) Immortalized brown adipocytes on day 0, 4, 10 of differentiation process. (B) Oil Red O staining of immortalized undifferentiated (upper) and differentiated (lower) brown adipocytes. (C) Relative mRNA levels of *Ucp1*, *Ppargc1a*, *Pparg*, *Cd36*, *Fndc5* (normalized to *actb*) ( $n=3$ ) of immortalized brown adipocytes. (D) Western blot of UCP1, PGC1  $\alpha$  and PPAR  $\gamma$  on immortalized undifferentiated and differentiated brown adipocytes. (E) OCR measurement on immortalized brown adipocytes under the treatments of different concentrations of T<sub>3</sub> for 30 min. (F) Quantitative analysis of basal respiration, maximal respiration, ATP production, and proton leak ( $n=4$ ). Data are presented as mean  $\pm$  SEM. \*  $p \leq 0.05$ , \*\*  $p \leq 0.01$ , \*\*\*\*  $p < 0.0001$ .

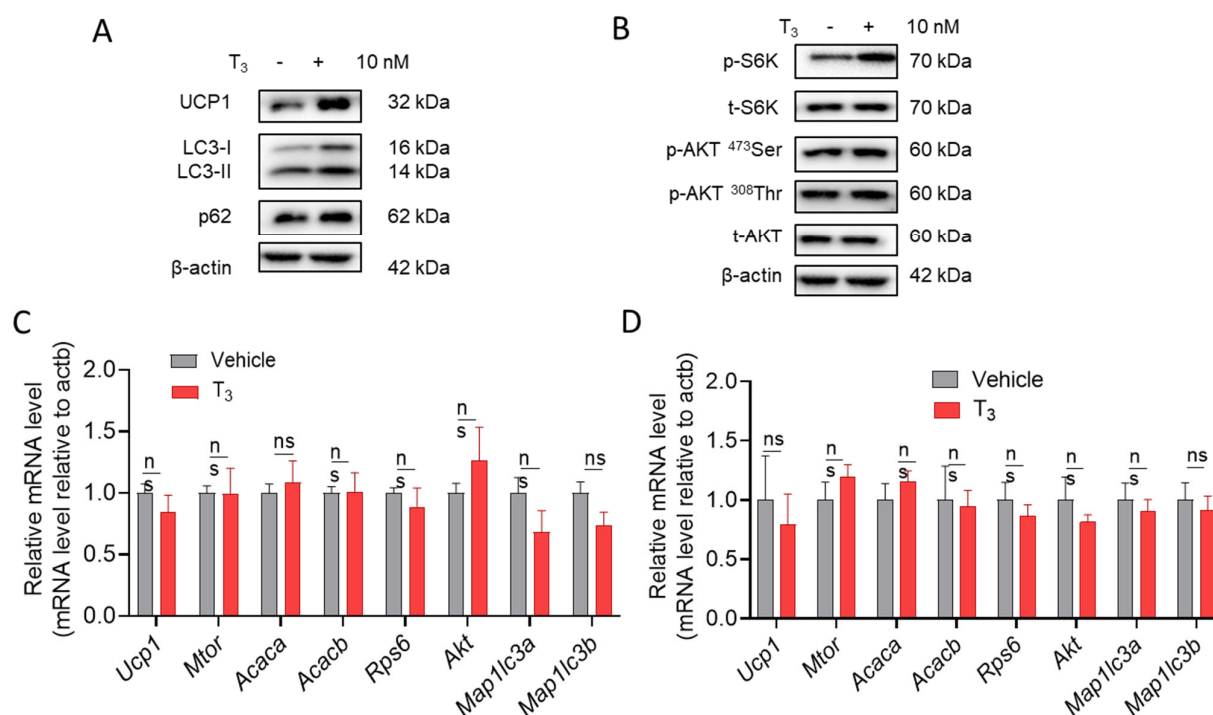

**Figure S2.** T<sub>3</sub> induces changes in cell signaling within 30 min. Western blots of (A) UCP1 and autophagy-related proteins, and (B) mTOR and akt signaling proteins with 10 nM T<sub>3</sub> treatment for 30 min in primary brown adipocytes. Relative mRNA levels of *Ucp1*, *Mtor*, *Acaca*, *Acacb*, *Rps6*, *Akt*, *Map1lc3a*, and *Map1lc3b* with 30 min of T<sub>3</sub> treatment in (C) immortalized, and (D) primary brown adipocytes. Data are presented as mean ± SEM, ns not significant.

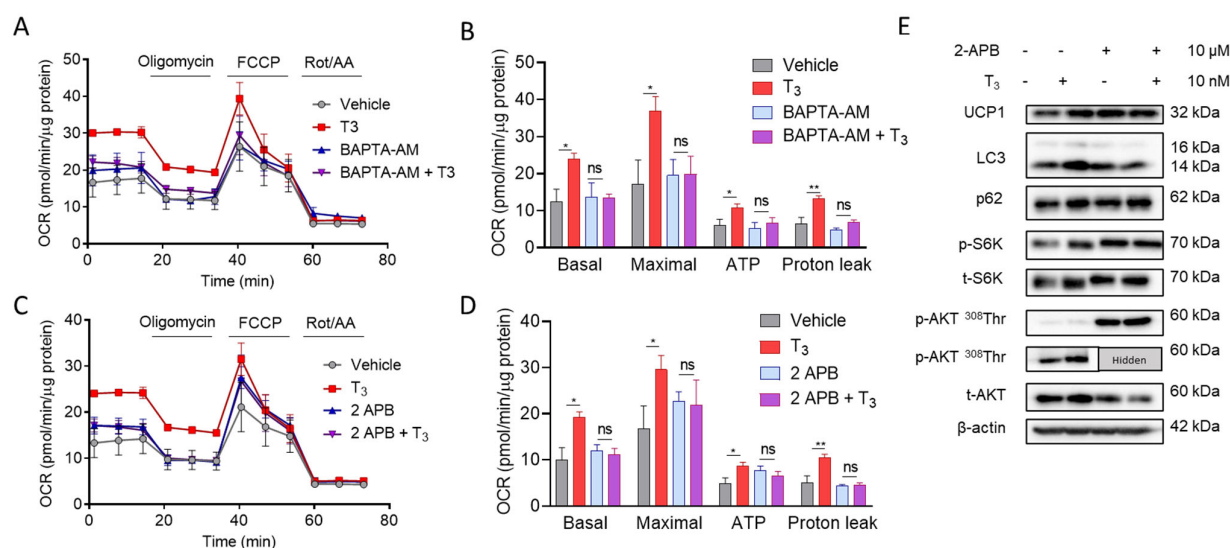

**Figure S3.** T<sub>3</sub>-induced cytosolic Ca<sup>2+</sup> increase regulates OCR and cell signaling alterations. (A) OCR measurement in immortalized brown adipocytes under 10 μM BAPTA-AM treatment for 1 h prior to 10 nM T<sub>3</sub> application for 30 min. (B) Quantitative analysis of basal respiration, maximal respiration, ATP production and proton leak. (C) OCR measurement in immortalized brown adipocytes under 10 μM 2-APB treatment for 1 h before 10 nM T<sub>3</sub> treatment for 30 min. (D) Quantitative analysis of basal respiration, maximal respiration, ATP production, and proton leak (*n*=4). (E) Western blot of UCP1, autophagy related proteins, and mTOR signaling proteins with 10 μM 2-APB treatment for 1 h before 10 nM T<sub>3</sub> treatment for 30 min in immortalized brown adipocytes. Data are presented as mean ± SEM. \* *p* < 0.05, \*\* *p* < 0.01, ns not significant.

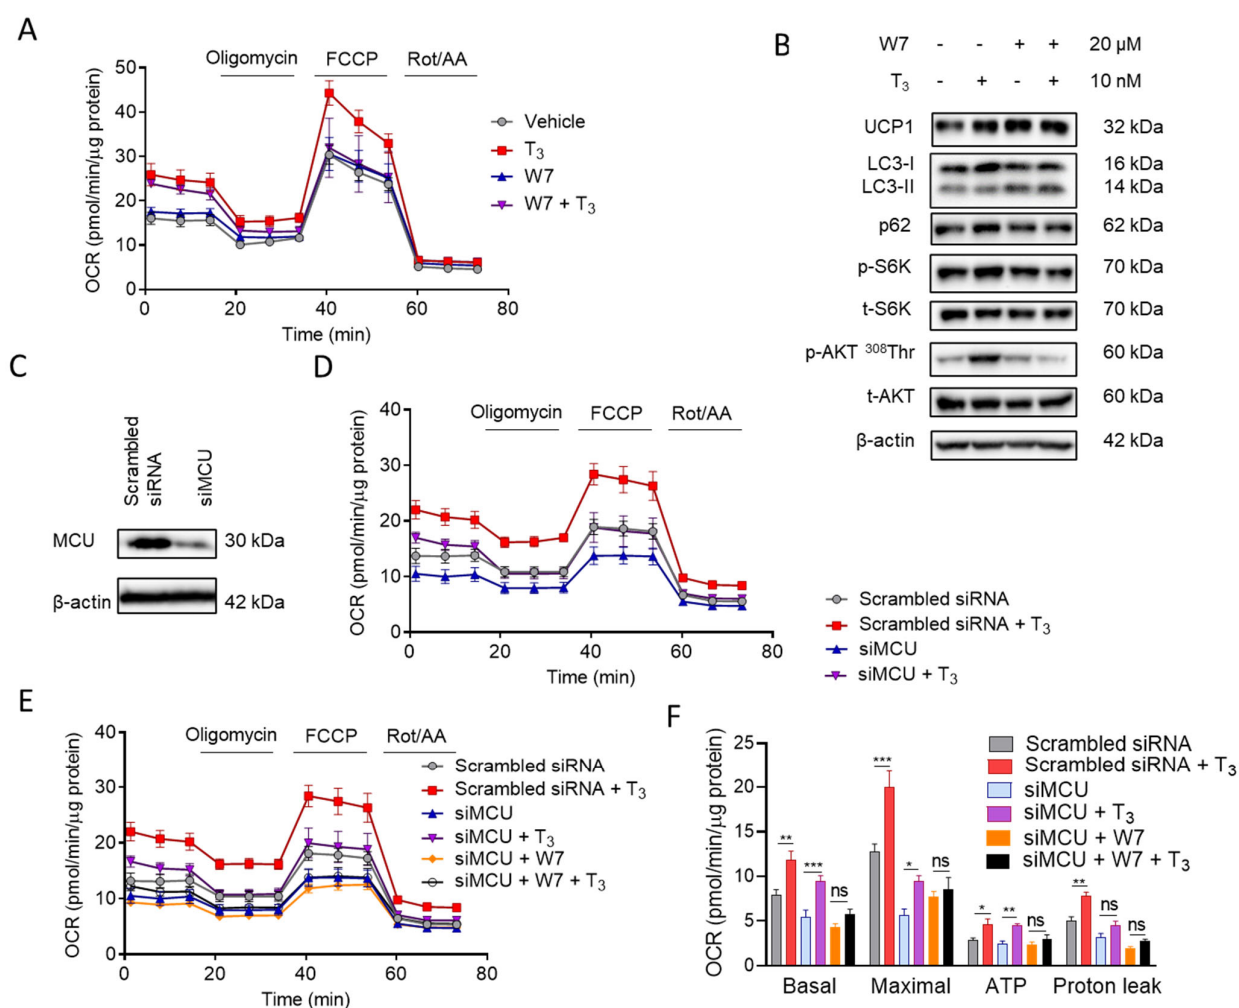

**Figure S4.** Both  $[Ca^{2+}]_i$ -CaM activation and mitochondrial  $Ca^{2+}$  influx are involved in  $T_3$ -induced OCR elevation. (A) OCR measurements in immortalized brown adipocytes with 20  $\mu$ M W7 treatment for 1 h before  $T_3$  treatment. (B) Western blot of several autophagy related proteins, and mTOR signaling pathway proteins in immortalized brown adipocytes with 20  $\mu$ M W7 application for 1 hour before 10 nM  $T_3$  treatment for 30 min. (C) Western blot of MCU under Scrambled siRNA and siMCU transfection in immortalized brown adipocytes. (D) OCR measurements of *Mcu* knockdown in immortalized brown adipocytes with 10 nM  $T_3$  treatment for 30 min. (E) OCR measurements of *Mcu* knockdown immortalized brown adipocytes with 20  $\mu$ M W7 treatment for 1 h before  $T_3$  application. (F) Quantitative analysis of basal respiration, maximal respiration, ATP production, and proton leak. Data are presented as mean  $\pm$  SEM. \*  $p \leq 0.05$ , \*\*  $p \leq 0.01$ , \*\*\*  $p < 0.001$ , ns not significant.

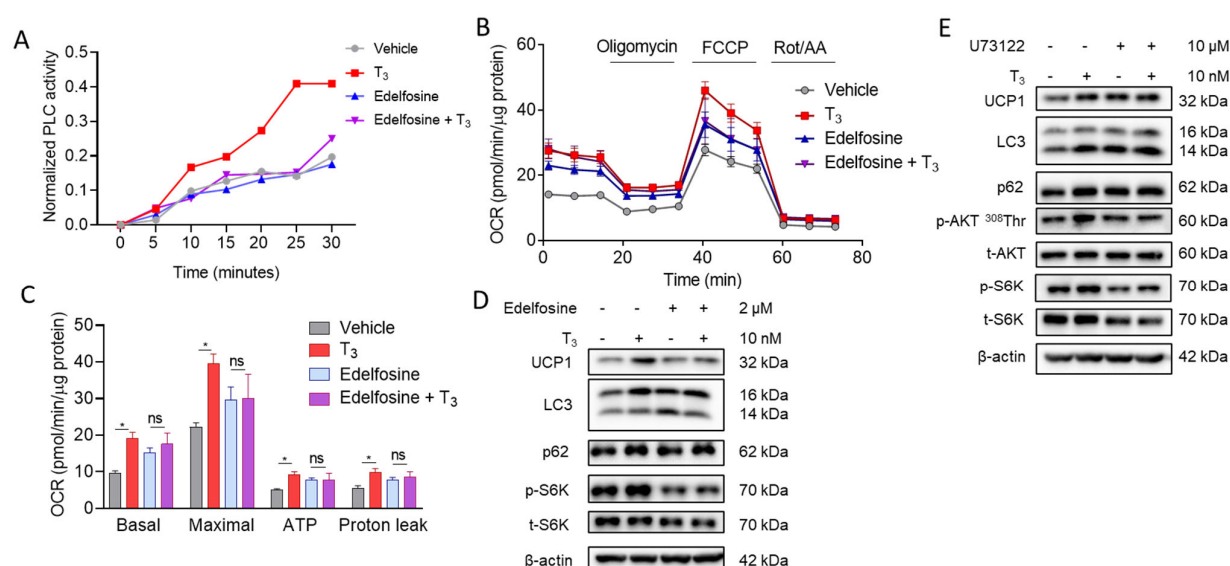

**Figure S5.** PLC inhibitors inhibit effects of T<sub>3</sub> in brown adipocytes. (A) PLC activity assay on immortalized undifferentiated brown adipocytes with 2 μM edelfosine treatment for 6 h prior 10 nM T<sub>3</sub> application for 30 min (B) OCR measurement in immortalized brown adipocytes with 2 μM edelfosine pretreatment. (C) Quantitative analysis of basal respiration, maximal respiration, ATP production and proton leak. (D) Western blot of UCP1, autophagy related proteins, and mTOR signaling proteins, with 2 μM edelfosine pretreatment in primary brown adipocytes. (E) Western blot of UCP1, autophagy related proteins, and mTOR signaling proteins, with 10 μM U73122 treatment for 6 h before 10 nM T<sub>3</sub> treatment for 30 min in immortalized brown adipocytes. Data are presented as mean ± SEM. \*  $p \leq 0.05$ , ns not significant.

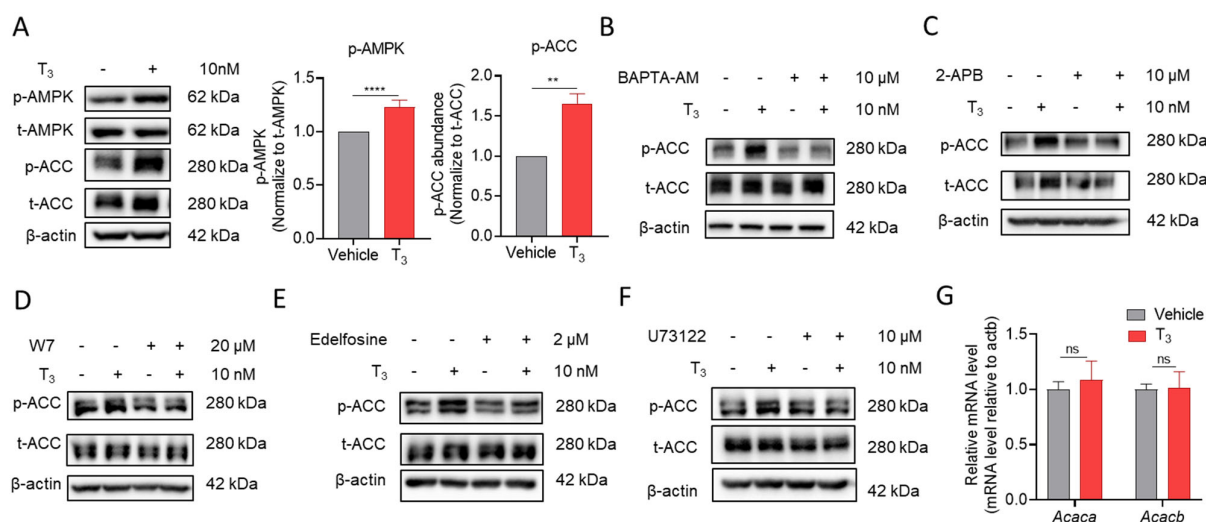

**Figure S6.** T<sub>3</sub> induces phosphorylations of AMP kinase (AMPK) and acetyl-coA carboxylase (ACC). (A) Western blot of AMPK and ACC with 10 nM T<sub>3</sub> treatment for 30 min in immortalized brown adipocytes. (B) Western blot of ACC in immortalized brown adipocytes with 10 μM BAPTA-AM treatment for 1 hour before 10 nM T<sub>3</sub> treatment for 30 min. (C) Western blot ACC with 10 μM 2-APB treatment for 1 h before 10 nM T<sub>3</sub> treatment for 30 min in immortalized brown adipocytes. (D) Western blot of ACC in immortalized brown adipocytes with 20 μM W7 treatment for 1 hour before 10 nM T<sub>3</sub> treatment for 30 min. (E) Western blot of ACC with 2 μM edelfosine treatment for 6 h before 10 nM T<sub>3</sub> treatment for 30 min in immortalized brown adipocytes. (F) Western blot of ACC with 10 μM U73122 treatment for 6 h before 10 nM T<sub>3</sub> treatment for 30 min in immortalized brown adipocytes. (G) Relative mRNA levels of *Acaca*, and *Acacb* with 30 min of T<sub>3</sub> in immortalized brown adipocytes. Data are presented as mean ± SEM. \*\*  $p \leq 0.01$ , \*\*\*\*  $p < 0.0001$ , ns not significant.

## Supplemental Methods

### 1. Small interfering RNA transfection

Brown adipocytes were transfected with 30 nM SiGENOME Smart-pool small interfering RNA (siRNA) duplexes for mouse *Mcu* (siGENOME; catalog no. 062849-01, Dharmacon, Thermo Fisher Scientific, Waltham, MA, USA) or negative control (catalog no. SN-1002, Bioneer, Daejeon, South Korea) mixed with DharmaFECT siRNA transfection reagent (catalog no. T-2001-03, Thermo Fisher Scientific, Waltham, MA, USA). The transfection efficacy was assessed after 72 h by western blotting.

### 2. PLC activity assay

Immortalized undifferentiated brown adipocytes were treated with 2  $\mu$ M edelfosine for 6 h prior 10 nM T<sub>3</sub> application for 30 min. The PLC activity was measured with Phospholipase C activity assay kit (catalog no. ab273343, Abcam, Cambridge, UK), based on manufacturer's instruction. The cells were lysed with PLC Assay buffer and then centrifuged at 10,000  $\times$  g at 4  $^{\circ}$ C for 20 min to collect the supernatants. The supernatants were mixed with PLC Assay buffer and reaction mix following the manufacture's protocol and incubated at 37  $^{\circ}$ C along with standard curve. The reaction product was measured the OD at 405 nm every 5 min. The data was normalized using the formulation equation (1).

$$\text{Normalized PLC activity} = \frac{A_t - A_0}{A_0} \quad (1)$$

A<sub>t</sub>, A<sub>0</sub>: Amount of colorimetric product generated from the Standard Curve (nmol) at 0 (min) or t (min) respectively.
